# Supplementary material
Source: PubMed Central journal article supplement (PMC8688329)
Supplement: NIHMS1755179-supplement-Supplemental_Data.pdf [file NIHMS1755179-supplement-Supplemental_Data.pdf]

**Supplemental Table  
Vendor**

|                           | <b>Cat. #</b> | <b>Antibody name</b>                                          |
|---------------------------|---------------|---------------------------------------------------------------|
| Cell Signaling Technology | 94296         | Mcl1                                                          |
| Cell Signaling Technology | 4223          | Bcl2                                                          |
| Cell Signaling Technology | 2827          | p-S70 Bcl2                                                    |
| Cell Signaling Technology | 966           | cleaved caspase 3                                             |
| Cell Signaling Technology | 14093         | A1                                                            |
| Cell Signaling Technology | 2724          | Bcl-w                                                         |
| Cell Signaling Technology | 2764          | Bcl-xL                                                        |
| Cell Signaling Technology | 12105         | Bak                                                           |
| Cell Signaling Technology | 2002          | Bid                                                           |
| Cell Signaling Technology | 2933          | Bim                                                           |
| Cell Signaling Technology | 5023          | Bax                                                           |
| Cell Signaling Technology | 9239          | Bad                                                           |
| Cell Signaling Technology | 12450         | PUMA                                                          |
| Cell Signaling Technology | 4904          | STAT3                                                         |
| Cell Signaling Technology | 9134          | p-STAT3                                                       |
| Cell Signaling Technology | 9542          | PARP Antibody                                                 |
| Cell Signaling Technology | 5625          | Cleaved PARP (Asp214) (D64E10) XP Rabbit mAb                  |
| Cell Signaling Technology | 9281          | Phospho-p53 (Ser392) Antibody                                 |
| Cell Signaling Technology | 9275          | Phospho-Akt (Thr308) Antibody                                 |
| Cell Signaling Technology | 4370          | phospho-p44/42 MAPK(Erk1/2) XP Rabbit mAb                     |
| Cell Signaling Technology | 4911          | Phospho-YAP(Ser127) antibody                                  |
| Cell Signaling Technology | 14074         | YAP (D8H1X) XP® Rabbit mAb                                    |
| Cell Signaling Technology | 3398          | Phospho-eIF2 $\alpha$ (Ser51) (D9G8) XP® Rabbit mAb           |
| Cell Signaling Technology | 5324          | eIF2 $\alpha$ (D7D3) XP® Rabbit mAb                           |
| Cell Signaling Technology | 5558          | Phospho-GSK-3 $\beta$ (Ser9) (D85E12) XP Rabbit mAb           |
| Cell Signaling Technology | 4176          | Phospho- $\beta$ -Catenin(Ser675)(D2F1) XP Rabbit mAb         |
| Cell Signaling Technology | 9520          | phospho-Smad3(Ser423/425)(C25A9) Rabbit mAb                   |
| Cell Signaling Technology | 8242          | NF- $\kappa$ B p65 (D14E12) XP® Rabbit mAb                    |
| Cell Signaling Technology | 3033          | Phospho-NF- $\kappa$ B p65 (Ser536) (93H1) Rabbit mAb         |
| Cell Signaling Technology | 2697          | Phospho-IKK $\alpha$ / $\beta$ (Ser176/180) (16A6) Rabbit mAb |
| Cell Signaling Technology | 4691          | Akt (pan) (C67E7) Rabbit mAb                                  |
| Cell Signaling Technology | 4695          | ERK1/2                                                        |
| Cell Signaling Technology | 8943          | IKK $\beta$ (D30C6) Rabbit mAb                                |
| Santa Cruz Biotechnology  | sc-126        | p53(DO-1)                                                     |
| Santa Cruz biotechnology  | sc-7985-R     | p-Akt1/2/3 (Ser473)-R                                         |
| Santa Cruz Biotechnology  | sc-8416       | p-p70 S6 kinase $\alpha$ (A-6)                                |
| Santa Cruz Biotechnology  | sc-7199       | $\beta$ -catenin (H-102 )                                     |
| Santa Cruz biotechnology  | sc-231        | RSK-1(C-21)                                                   |
| Santa Cruz Biotechnology  | sc-8418       | p70 S6 kinase $\alpha$ (H-9)                                  |
| BD Bioscience             | 610201        | GSK3 $\beta$                                                  |
| Millipore                 | 4418          | p-S380 RSK                                                    |

# Supplemental Figure 1

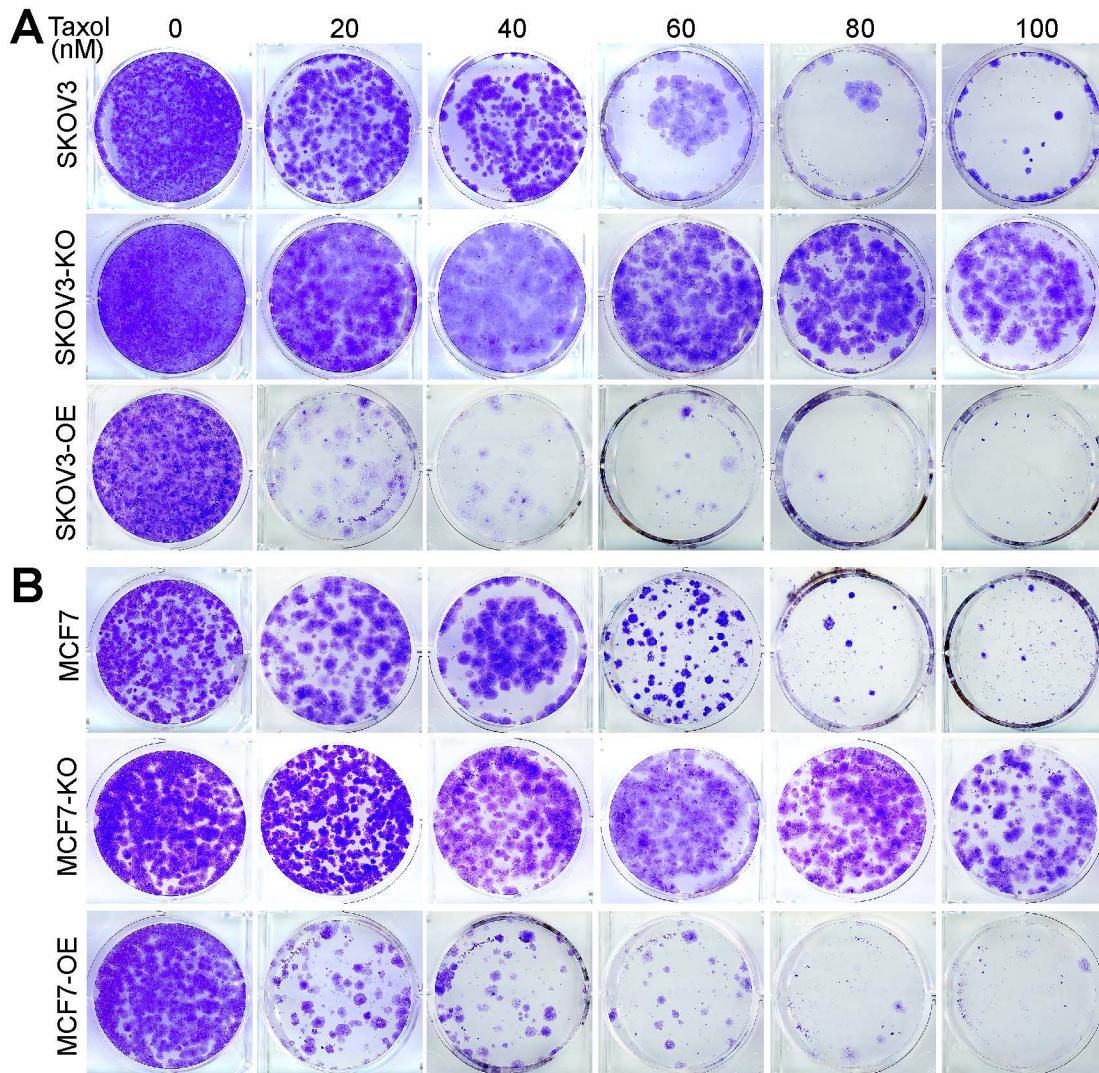

**Figure S1 Deletion of PKR promotes cell survival in response to taxol treatment (A, B)** Two thousand cells (parental, PKR-KO, or PKR-OE) were seeded into 6-well plates and incubated overnight. The cells were then treated for 24 h with the indicated concentrations of taxol. Representative images from three biological repeats were shown. KO: knockout; OE: overexpression.

## Supplemental Figure 2

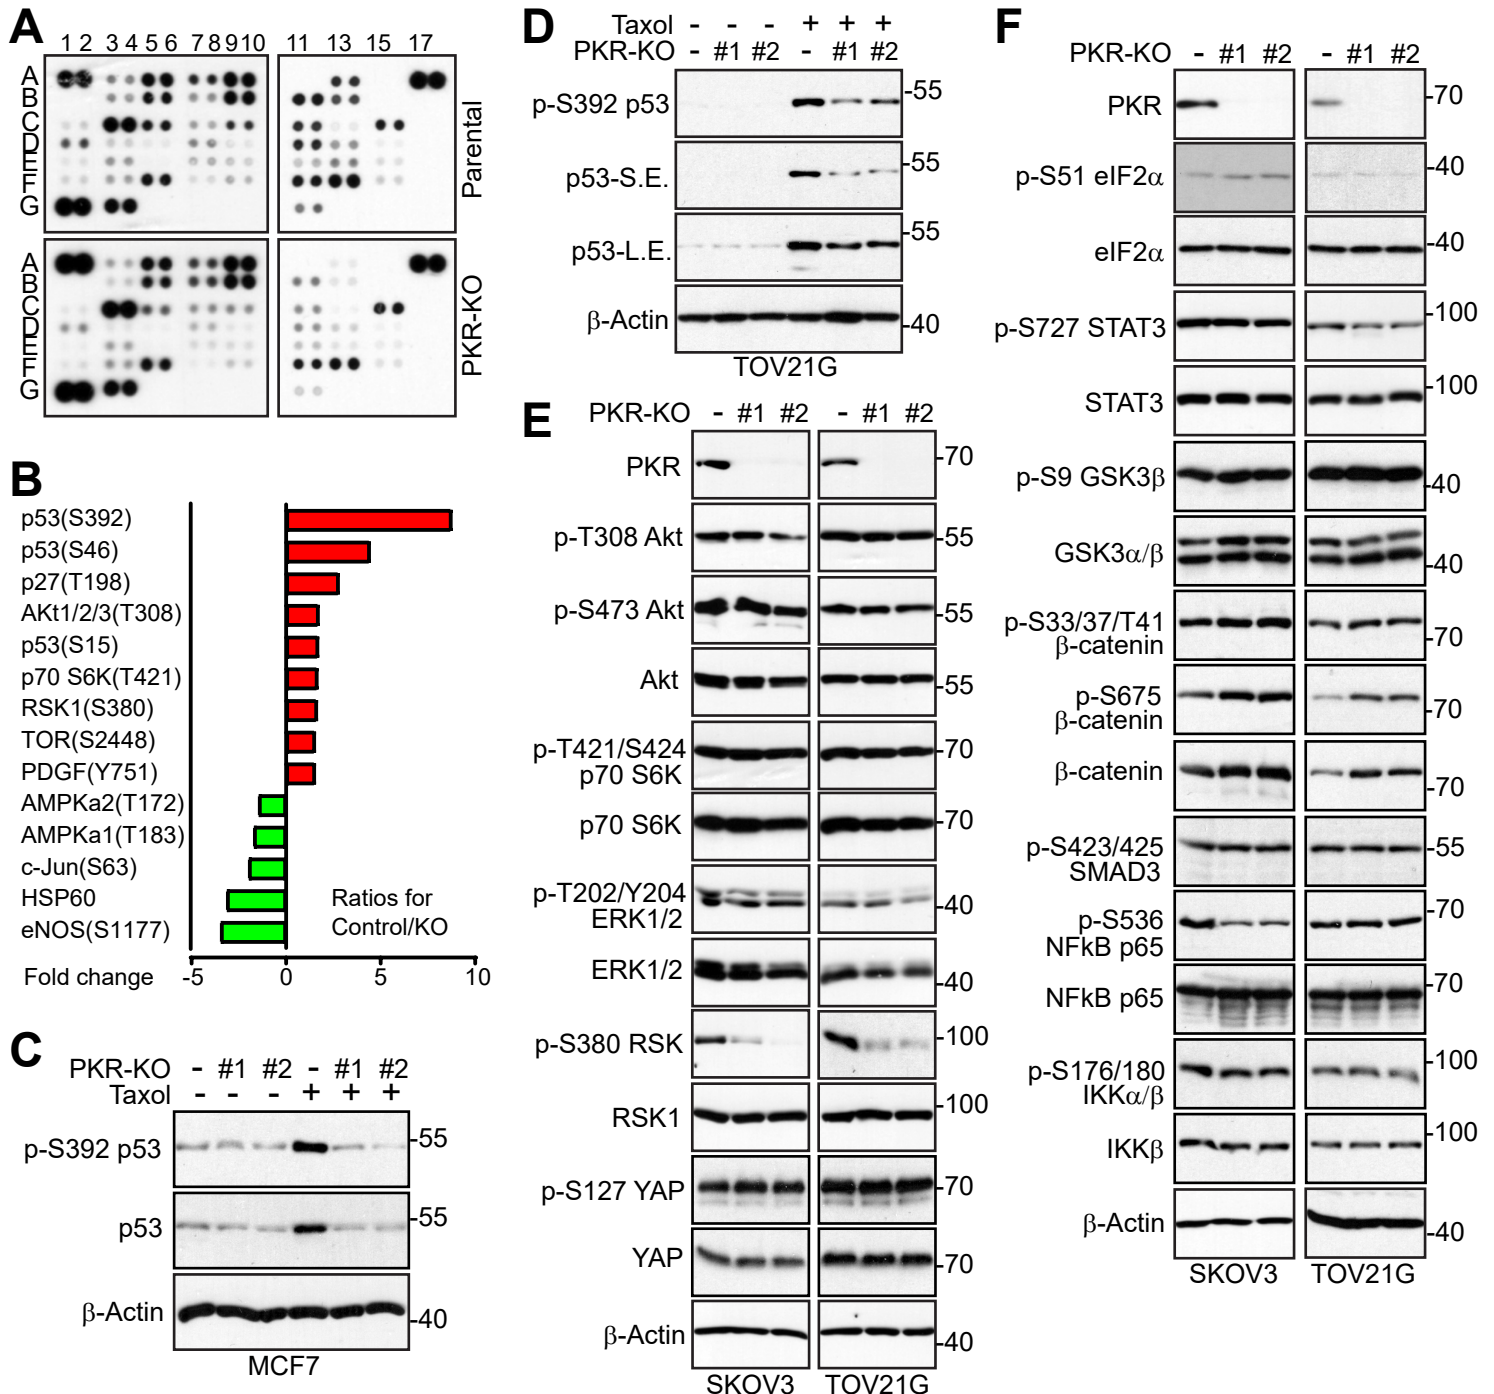

### Figure S2 PKR regulates RSK activity and p53 expression

(A) SKOV3 parental and SKOV3-PKR-KO cells were treated with taxol (100 nM) for 24 h and cell lysates were incubated with Human Phospho-Kinase Array and analyzed with accompanying software.

(B) Alterations of phospho-kinases in response to taxol upon PKR deletion. The data were generated by an online software accompanying the Kit (R&D Systems).

(C, D) PKR deletion blocked p53 expression induced by taxol in TOV21G and MCF-7 cells. Cells were treated with taxol (100 nM) for 24 h and total cell lysates were probed with the indicated antibodies.

(E, F) Western blot analysis of major signaling pathways in parental and PKR-KO cells. Signaling or pathways are Akt-S6K, RSK-ERK, YAP, Jak-STAT, Wnt-β-catenin, TGF-SMAD, and NF-κB. The main substrate of PKR eIF2α is also included.
